# Supplementary material
Source: Springer Nature journal article supplement (https://hal.science/hal-01290561v1/file/13567_2013_368_MOESM8_ESM.pdf)

**A**

|              | signal peptide                  | 20                            | $\alpha 1$ domain             | 40                            |                                   |
|--------------|---------------------------------|-------------------------------|-------------------------------|-------------------------------|-----------------------------------|
| BoLA-T5      | <b>MRPRTLFLVLL</b>              | <b>LGALALTETR</b>             | <b>AGSHSLRYFY</b>             | <b>TAVSRPGLGE</b>             | <b>PRFISVGYVD</b> 50              |
| BoLA-1*02301 | <b>MGPRTLFLVLL</b>              | <b>LGALALTETR</b>             | <b>AGSHSLRYFY</b>             | <b>TAVSRPGLGE</b>             | <b>PRFISVGYVD</b> 50              |
|              | 60                              |                               | 80                            |                               | 100                               |
| BoLA-T5      | <b>DTQFVRFDSD</b>               | <b>APNPREEPRA</b>             | <b>PWIEKEGPEY</b>             | <b>WDRETRISKE</b>             | <b>NTLVYRESLN</b> 100             |
| BoLA-1*02301 | <b>DTQFVRFDSD</b>               | <b>APNPREEPRA</b>             | <b>PWIEKEGPEY</b>             | <b>WDRETRISKE</b>             | <b>NTLVYRESLN</b> 100             |
|              |                                 | 120                           |                               | 140                           |                                   |
| BoLA-T5      | <b>NLRGYYNQSE</b>               | <b>AGSH<sup>*</sup>TLQLMY</b> | <b>GCDVGP<sup>*</sup>DGRL</b> | <b>LRGY<sup>*</sup>RQDAYD</b> | <b>SRDYIALNEE</b> 150             |
| BoLA-1*02301 | <b>NLRGYYNQSE</b>               | <b>AGSH<sup>*</sup>NIQAMY</b> | <b>GCDVGS<sup>*</sup>DGSF</b> | <b>LRGYSQDAYD</b>             | <b>GRDYIALNED</b> 150             |
|              | 160                             |                               | 180                           |                               | 200                               |
| BoLA-T5      | <b>LRSWTAADTA</b>               | <b>AQITKRKWEA</b>             | <b>EGYAESLRNY</b>             | <b>LEGRCVEWLR</b>             | <b>RYLENGKDAL</b> 200             |
| BoLA-1*02301 | <b>LRSWTAADTA</b>               | <b>AQITKRKWEA</b>             | <b>EGYAESLRNY</b>             | <b>LEGRCVEWLR</b>             | <b>RYLENGKDAL</b> 200             |
|              |                                 | 220                           |                               | 240                           |                                   |
| BoLA-T5      | <b>LRADPPMAHV</b>               | <b>THHPSSEREV</b>             | <b>TLRCWALGFY</b>             | <b>PKEISLWQWR</b>             | <b>EGEDQTDME</b> 250              |
| BoLA-1*02301 | <b>LRADPPMAHV</b>               | <b>THHPSSEREV</b>             | <b>TLRCWALGFY</b>             | <b>PKEISLWQWR</b>             | <b>EGEDQTDME</b> 250              |
|              | 260                             |                               | 280                           |                               | 300                               |
| BoLA-T5      | <b>LVETRPSGDG</b>               | <b>TFQKWAALVV</b>             | <b>PSGEEQ<sup>*</sup>KYTC</b> | <b>HVQHEGLQEP</b>             | <b>LILRWEP<sup>*</sup>PQT</b> 300 |
| BoLA-1*02301 | <b>LVETRPSGDG</b>               | <b>TFQKWAALVV</b>             | <b>PSGEEQ<sup>*</sup>RYTC</b> | <b>HVQHEGLQEP</b>             | <b>LILRWEP<sup>*</sup>PQT</b> 300 |
|              |                                 | 320                           |                               | 340                           |                                   |
| BoLA-T5      | <b>SFLIMGII<sup>*</sup>IVG</b>  | <b>LVLLVVAVVA</b>             | <b>GAVIWRKKRS</b>             | <b>GEKRQ<sup>*</sup>HTQA</b>  | <b>ASGSDSQGSD</b> 350             |
| BoLA-1*02301 | <b>SFLIMGII<sup>*</sup>IVG</b>  | <b>LVLLVVAVVA</b>             | <b>GAVIWRKKRS</b>             | <b>GEKRQ<sup>*</sup>YTQA</b>  | <b>ASGSDSQGSD</b> 350             |
|              |                                 |                               |                               |                               |                                   |
| BoLA-T5      | <b>VSRMVPKA</b> 358             |                               |                               |                               |                                   |
| BoLA-1*02301 | <b>VS<sup>*</sup>LTVPKV</b> 358 |                               |                               |                               |                                   |

**B**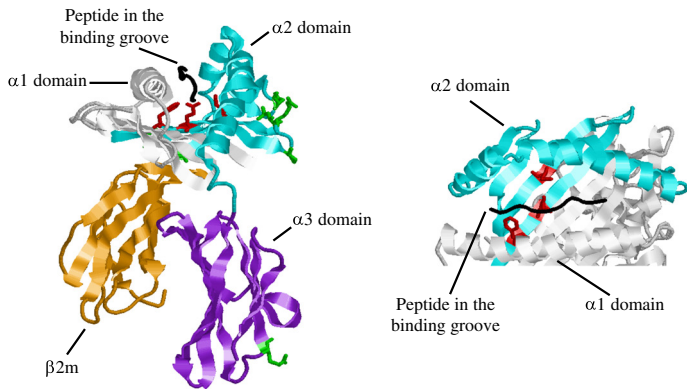

Supplement: MOESM8 [file 13567_2013_368_MOESM8_ESM.pdf]
